# Supplementary material
Source: PubMed Central journal article supplement (PMC7205500)
Supplement: AEM.02662-19-s0001.pdf [file AEM.02662-19-s0001.pdf]

## SUPPLEMENTARY MATERIALS

TABLE S1

The list of all OTUs with significant LEfSe scores is provided in the Supplemental Table (S1) to determine microbial communities that were statistically associated with community compositional differences across stages and across treatments. The LDA scores were normalized by log<sub>10</sub>. Relative abundance is significant when  $P < 0.05$ , logarithmic LDA score  $\geq 2.0$ . Five highlighted OTUs explained the greatest differences across stages, but not across treatments.

| Biomarker | Taxonomy                                                                                              | Abundance | Group   | LDA    | Pvalue   |
|-----------|-------------------------------------------------------------------------------------------------------|-----------|---------|--------|----------|
| Otu00527  | Bacteria Proteobacteria Alphaproteobacteria unclassified unclassified unclassified Otu00527           | 2.1358    | Two-wk  | 3.3874 | 0.0047   |
| Otu00410  | Bacteria Proteobacteria Alphaproteobacteria Rhizobiales Aurantimonadaceae Aurantimonas Otu00410       | 3.4337    | Pre-fed | 3.3205 | 0.0344   |
| Otu00094  | Bacteria Firmicutes Bacilli Lactobacillales Carnobacteriaceae Carnobacterium Otu00094                 | 3.0166    | Two-wk  | 2.8297 | 0.0001   |
| Otu00091  | Bacteria Proteobacteria Gammaproteobacteria Oceanospirillales Halomonadaceae Halomonas Otu00091       | 3.4477    | One-wk  | 3.1380 | 0.0083   |
| Otu00060  | Bacteria Proteobacteria Betaproteobacteria Burkholderiales unclassified unclassified Otu00060         | 3.3097    | One-wk  | 3.0489 | 0.0419   |
| Otu00061  | Bacteria Proteobacteria Betaproteobacteria unclassified unclassified unclassified Otu00061            | 3.5395    | Two-wk  | 3.2503 | 0.0045   |
| Otu00117  | Bacteria Proteobacteria Gammaproteobacteria Xanthomonadales Xanthomonadaceae unclassified Otu00117    | 3.0468    | One-wk  | 3.1467 | 0.0320   |
| Otu00026  | Bacteria Proteobacteria Alphaproteobacteria Rhizobiales Phyllobacteriaceae Nitratireductor Otu00026   | 4.0398    | One-wk  | 3.7592 | 2.28E-07 |
| Otu00002  | Bacteria Firmicutes Clostridia Clostridiales Clostridiaceae_1 Sarcina Otu00002                        | 5.2821    | Two-wk  | 4.9588 | 0.0021   |
| Otu00004  | Bacteria Firmicutes Clostridia Clostridiales Clostridiaceae_1 unclassified Otu00004                   | 4.7512    | Two-wk  | 4.4746 | 0.0005   |
| Otu00042  | Bacteria Proteobacteria Alphaproteobacteria Rhodobacterales Rhodobacteraceae unclassified Otu00042    | 3.7411    | Two-wk  | 3.4403 | 6.30E-09 |
| Otu00048  | Bacteria Proteobacteria Alphaproteobacteria Rhodobacterales Rhodobacteraceae unclassified Otu00048    | 3.4756    | Two-wk  | 3.1857 | 0.0007   |
| Otu00132  | Bacteria Proteobacteria Gammaproteobacteria Chromatiales Chromatiaceae Rheinheimera Otu00132          | 3.0872    | Pre-fed | 3.2073 | 0.0344   |
| Otu00058  | Bacteria Firmicutes Bacilli Lactobacillales Streptococcaceae Streptococcus Otu00058                   | 3.4626    | One-wk  | 3.0579 | 0.0356   |
| Otu00052  | Bacteria Proteobacteria Alphaproteobacteria Rhizobiales Methylobacteriaceae Methylobacterium Otu00052 | 3.7160    | One-wk  | 3.4676 | 0.0498   |

|          |                                                                                                          |        |         |        |          |
|----------|----------------------------------------------------------------------------------------------------------|--------|---------|--------|----------|
| Otu00054 | Bacteria "Proteobacteria" Betaproteobacteria Burkholderiales Comamonadaceae Hydrogenophaga Otu00054      | 3.8101 | Pre-fed | 3.4362 | 0.0182   |
| Otu00024 | Bacteria "Proteobacteria" Gammaproteobacteria Xanthomonadales Xanthomonadaceae Stenotrophomonas Otu00024 | 4.3703 | Pre-fed | 3.9573 | 7.85E-05 |
| Otu00027 | Bacteria Firmicutes Bacilli Bacillales Planococcaceae Jeotgalibacillus Otu00027                          | 3.8985 | Two-wk  | 3.5961 | 1.90E-07 |
| Otu00023 | Bacteria "Proteobacteria" Betaproteobacteria Burkholderiales Comamonadaceae unclassified Otu00023        | 4.3195 | Pre-fed | 4.0130 | 0.0003   |
| Otu00029 | Bacteria "Proteobacteria" Gammaproteobacteria "Vibrionales" Vibrionaceae Vibrio Otu00029                 | 4.1601 | One-wk  | 3.8736 | 3.59E-11 |
| Otu00020 | Bacteria "Actinobacteria" Actinobacteria Actinomycetales Micrococcaceae unclassified Otu00020            | 4.4156 | Pre-fed | 3.9467 | 0.0021   |
| Otu00038 | Bacteria "Proteobacteria" Betaproteobacteria Burkholderiales Burkholderiaceae Ralstonia Otu00038         | 4.1446 | Pre-fed | 3.6999 | 0.0100   |
| Otu00034 | Bacteria "Proteobacteria" Gammaproteobacteria Xanthomonadales Xanthomonadaceae Stenotrophomonas Otu00034 | 4.0837 | Pre-fed | 3.7844 | 0.0261   |
| Otu00030 | Bacteria "Proteobacteria" Alphaproteobacteria Rhodobacterales Rhodobacteraceae Loktanella Otu00030       | 4.0715 | One-wk  | 3.7751 | 8.19E-05 |
| Otu02230 | Bacteria "Bacteroidetes" "Bacteroidia" "Bacteroidales" "Porphyromonadaceae" unclassified Otu02230        | 1.6612 | Pre-fed | 3.9043 | 0.0344   |
| Otu00795 | Bacteria Firmicutes Bacilli Lactobacillales Streptococcaceae Lactococcus Otu00795                        | 2.0566 | Two-wk  | 3.1392 | 0.0010   |
| Otu00005 | Bacteria Firmicutes Bacilli Bacillales Bacillales_Incertae_Sedis_XII Exiguobacterium Otu00005            | 4.7475 | One-wk  | 4.4294 | 4.57E-05 |
| Otu00009 | Bacteria Firmicutes Clostridia Clostridiales Clostridiaceae_1 unclassified Otu00009                      | 4.4099 | Two-wk  | 4.0842 | 2.50E-05 |
| Otu00011 | Bacteria "Proteobacteria" Gammaproteobacteria Pseudomonadales Pseudomonadaceae Pseudomonas Otu00011      | 4.5397 | Pre-fed | 4.2259 | 0.0122   |
| Otu00680 | Bacteria "Proteobacteria" Alphaproteobacteria Sphingomonadales Sphingomonadaceae Sphingomonas Otu00680   | 2.4556 | One-wk  | 3.5219 | 0.0183   |
| Otu00377 | Bacteria Firmicutes Bacilli Bacillales Staphylococcaceae Jeotgalicoccus Otu00377                         | 2.5935 | Pre-fed | 3.2566 | 0.0344   |
| Otu00015 | Bacteria "Actinobacteria" Actinobacteria Actinomycetales Corynebacteriaceae Turicella Otu00015           | 4.5914 | Pre-fed | 4.1666 | 0.0085   |
| Otu00551 | Bacteria "Actinobacteria" Actinobacteria Actinomycetales unclassified unclassified Otu00551              | 2.5276 | One-wk  | 3.1669 | 0.0183   |
| Otu00017 | Bacteria "Actinobacteria" Actinobacteria Actinomycetales Corynebacteriaceae Corynebacterium Otu00017     | 4.2374 | One-wk  | 3.9257 | 0.0026   |
| Otu00016 | Bacteria "Proteobacteria" Gammaproteobacteria Pseudomonadales Pseudomonadaceae Pseudomonas Otu00016      | 4.1440 | Two-wk  | 3.8142 | 0.0002   |
| Otu00012 | Bacteria "Actinobacteria" Actinobacteria Actinomycetales Corynebacteriaceae Corynebacterium Otu00012     | 4.5504 | Pre-fed | 4.0733 | 0.0004   |
| Otu00353 | Bacteria "Bacteroidetes" Flavobacteria Flavobacteriales Flavobacteriaceae Chryseobacterium Otu00353      | 2.7309 | One-wk  | 3.0988 | 0.0064   |
| Otu00014 | Bacteria "Proteobacteria" Gammaproteobacteria Pseudomonadales Moraxellaceae Acinetobacter Otu00014       | 4.2644 | Pre-fed | 3.9722 | 0.0082   |
| Otu00010 | Bacteria "Proteobacteria" Alphaproteobacteria Rhodobacterales Rhodobacteraceae Paracoccus Otu00010       | 4.4173 | Pre-fed | 4.1726 | 0.0048   |
| Otu00013 | Bacteria "Proteobacteria" Alphaproteobacteria Rhodobacterales Rhodobacteraceae Paracoccus Otu00013       | 4.1647 | One-wk  | 3.5870 | 0.0191   |

|          |                                                                                                       |        |         |        |          |
|----------|-------------------------------------------------------------------------------------------------------|--------|---------|--------|----------|
| Otu01775 | Bacteria "Proteobacteria" Alphaproteobacteria Rhodobacterales Rhodobacteraceae unclassified Otu01775  | 1.3576 | Two-wk  | 3.8146 | 0.0078   |
| Otu00398 | Bacteria "Proteobacteria" Gammaproteobacteria Alteromonadales Alteromonadaceae Alteromonas Otu00398   | 2.5945 | One-wk  | 3.1229 | 0.0183   |
| Otu00082 | Bacteria "Proteobacteria" Alphaproteobacteria Rhizobiales Hyphomicrobiaceae Devosia Otu00082          | 3.2004 | One-wk  | 3.0175 | 4.53E-05 |
| Otu00084 | Bacteria "Actinobacteria" Actinobacteria Actinomycetales Mycobacteriaceae Mycobacterium Otu00084      | 3.2788 | One-wk  | 3.0152 | 0.0352   |
| Otu00008 | Bacteria "Proteobacteria" Alphaproteobacteria Caulobacterales Caulobacteraceae Brevundimonas Otu00080 | 4.8780 | Pre-fed | 4.5864 | 0.0041   |

---

TABLE S2

Relative abundance of predominant taxa defined at threshold > 0.01, for all fish gut microbiomes samples across four treatment groups, denoted as **S** (fish raised in natal stream, fed live Artemia); **Sp** (fish raised in natal stream, fed live Artemia fish mixed with retentate); **GW** (fish raised in groundwater, fed live Artemia); **GWp** (fish raised in groundwater, fed live Artemia mixed with retentate). These are the most abundant 30 taxa that were selected based on the predefined threshold of 0.01

| Phylum         | Genus            | Pre-feeding |       |       |       | One-week active feeding |       |       |       | Two-week active feeding |       |       |       |
|----------------|------------------|-------------|-------|-------|-------|-------------------------|-------|-------|-------|-------------------------|-------|-------|-------|
|                |                  | GW          | GWp   | S     | Sp    | GW                      | GWp   | S     | Sp    | GW                      | GWp   | S     | Sp    |
| Actinobacteria | Turicella        | 0.026       | 0.111 | rare  | rare  | rare                    | rare  | rare  | rare  | rare                    | rare  | rare  | rare  |
| Actinobacteria | Corynebacteria   | 0.060       | 0.042 | 0.059 | 0.037 | 0.034                   | rare  | 0.011 | 0.032 | rare                    | rare  | rare  | rare  |
| Actinobacteria | Janibacter       | rare        | 0.012 | rare  | rare  | rare                    | rare  | rare  | rare  | rare                    | rare  | rare  | rare  |
| Actinobacteria | Micrococcus      | 0.015       | rare  | rare  | 0.010 | rare                    | rare  | rare  | rare  | rare                    | rare  | rare  | rare  |
| Actinobacteria | unclassified     | 0.023       | 0.027 | 0.045 | 0.024 | 0.014                   | rare  | 0.015 | 0.026 | rare                    | rare  | rare  | rare  |
| Bacteroidetes  | Bacteroides      | rare        | rare  | rare  | 0.011 | rare                    | rare  | rare  | rare  | rare                    | rare  | rare  | rare  |
| Bacteroidetes  | Parabacteroides  | rare        | rare  | 0.011 | rare  | rare                    | rare  | rare  | rare  | rare                    | rare  | rare  | rare  |
| Bacteroidetes  | unclassified     | rare        | 0.047 | 0.016 | 0.061 | 0.010                   | rare  | rare  | 0.023 | rare                    | rare  | rare  | rare  |
| Bacteroidetes  | Wautersiella     | rare        | rare  | 0.011 | rare  | rare                    | rare  | rare  | rare  | rare                    | rare  | rare  | rare  |
| Firmicutes     | Clostridium      |             |       |       |       |                         |       |       |       |                         |       |       |       |
| Firmicutes     | sensu_stricto    | rare        | rare  | 0.115 | 0.011 | rare                    | 0.650 | 0.231 | 0.162 | 0.180                   | 0.148 | 0.439 | 0.369 |
| Firmicutes     | Exiguobacterium  | rare        | rare  | 0.011 | rare  | 0.164                   | 0.023 | 0.167 | 0.038 | 0.056                   | 0.037 | 0.098 | 0.110 |
| Firmicutes     | Jeotgalibacillus | rare        | rare  | rare  | rare  | 0.023                   | rare  | rare  | rare  | 0.015                   | 0.014 | 0.010 | 0.011 |
| Firmicutes     | Sarcina          | rare        | rare  | 0.020 | rare  | 0.227                   | 0.049 | 0.206 | 0.123 | 0.212                   | 0.348 | 0.272 | 0.377 |

|                |                  |       |       |       |       |       |       |       |       |       |       |       |       |
|----------------|------------------|-------|-------|-------|-------|-------|-------|-------|-------|-------|-------|-------|-------|
| Firmicutes     | Staphylococcus   | 0.011 | 0.029 | 0.017 | rare  |
| Firmicutes     | Streptococcus    | 0.023 | 0.023 | 0.010 | 0.050 | rare  | rare  | rare  | 0.015 | rare  | rare  | rare  | rare  |
| Firmicutes     | unclassified     | 0.023 | 0.031 | 0.023 | 0.042 | rare  | 0.108 | 0.073 | 0.091 | 0.210 | 0.130 | 0.122 | 0.064 |
| Proteobacteria | Acinetobacter    | 0.027 | 0.015 | 0.070 | 0.022 | 0.030 | 0.010 | rare  | 0.057 | rare  | rare  | rare  | rare  |
| Proteobacteria | Brevundimonas    | 0.010 | 0.019 | rare  |
| Proteobacteria | Deefgea          | rare  | rare  | rare  | rare  | rare  | 0.018 | rare  | rare  | 0.205 | 0.216 | 0.013 | rare  |
| Proteobacteria | Loktanella       | rare  | rare  | rare  | rare  | 0.098 | rare  |
| Proteobacteria | Nitratireductor  | rare  | rare  | rare  | rare  | rare  | rare  | 0.039 | 0.023 | 0.011 | rare  | rare  | rare  |
| Proteobacteria | Pseudomonas      | 0.239 | 0.163 | 0.165 | 0.138 | 0.037 | rare  | 0.050 | 0.043 | rare  | rare  | rare  | 0.003 |
| Proteobacteria | Paracoccus       | 0.053 | 0.072 | 0.015 | 0.035 | 0.067 | 0.024 | rare  | 0.066 | 0.032 | 0.019 | rare  | rare  |
| Proteobacteria | Rheinheimera     | rare  | rare  | 0.083 | rare  |
| Proteobacteria | Stenotrophomonas | 0.045 | 0.049 | 0.044 | 0.029 | rare  | rare  | 0.028 | 0.022 | rare  | rare  | rare  | rare  |
| Proteobacteria | Vibrio           | rare  | rare  | rare  | rare  | 0.048 | rare  | 0.020 | 0.010 | rare  | rare  | rare  | rare  |
| Proteobacteria | unclassified     | 0.138 | 0.056 | 0.082 | 0.202 | 0.067 | 0.020 | 0.028 | 0.084 | 0.034 | 0.049 | rare  | 0.010 |
| Unclassified   | unclassified     | 0.022 | 0.026 | 0.026 | 0.060 | 0.017 | rare  | 0.012 | 0.014 | rare  | rare  | rare  | rare  |
| Others         |                  | 0.285 | 0.279 | 0.177 | 0.272 | 0.163 | 0.097 | 0.121 | 0.170 | 0.045 | 0.039 | 0.045 | 0.055 |

At the genus level pre-feeding gut communities across all treatment groups were dominated by *Proteobacteria* from the genus *Pseudomonas*, comprising between 13 to 23% of total community composition. This genus was also present in food and water, although at considerably lower levels (~1%). Upon initiation of feeding, several *Firmicutes* genera including *Sarcina*, *Exiguobacterium*, and *Clostridium* emerged as the predominant taxa in the lake sturgeon larval gut microbiota sampled after one week of active feeding. As fish aged, *Sarcina* persisted among predominate taxa comprising ~20-30% of the gut community in all **GW**, **GWp**, **S**, and **Sp** groups. However, fish raised in stream water (**S**, **Sp**) had

*Clostridium* as the most predominant taxa after two weeks of active feeding, whereas *Deefgea* in the phylum *Proteobacteria* was as prevalent as *Sarcina* in fish raised in the ground water treatment.

TABLE S3

Relative abundance of predominant taxa defined at threshold > 0.01 for all microbial communities from water samples denoted as **WaterS** (stream); **WaterGW** (groundwater that was UV-treated). These are the most abundant 40 taxa that were selected based on the predefined threshold of 0.01

| Phylum         | Genus          | Pre-feeding |        | One-week active feeding |        | Two-week active feeding |        |
|----------------|----------------|-------------|--------|-------------------------|--------|-------------------------|--------|
|                |                | WaterGW     | WaterS | WaterGW                 | WaterS | WaterGW                 | WaterS |
| Acidobacteria  | Gp1            | 0.022       | 0.027  | 0.032                   | rare   | rare                    | rare   |
| Acidobacteria  | Gp2            | rare        | rare   | rare                    | 0.022  | rare                    | rare   |
| Acidobacteria  | Gp3            | rare        | rare   | rare                    | 0.024  | rare                    | rare   |
| Acidobacteria  | Gp4            | rare        | 0.010  | rare                    | 0.028  | rare                    | rare   |
| Acidobacteria  | Gp5            | 0.013       | 0.013  | rare                    | rare   | rare                    | rare   |
| Acidobacteria  | Gp6            | rare        | rare   | 0.041                   | rare   | rare                    | 0.024  |
| Acidobacteria  | Gp10           | rare        | rare   | rare                    | rare   | rare                    | 0.025  |
| Acidobacteria  | Gp21           | rare        | rare   | rare                    | rare   | 0.044                   | rare   |
| Actinobacteria | Turicella      | rare        | 0.079  | 0.185                   | rare   | rare                    | 0.097  |
| Actinobacteria | Corynebacteria | 0.039       | 0.094  | 0.117                   | rare   | 0.033                   | 0.094  |
| Actinobacteria | Janibacter     | rare        | rare   | rare                    | rare   | rare                    | 0.014  |
| Actinobacteria | Micrococcus    | rare        | 0.024  | 0.040                   | rare   | 0.108                   | 0.047  |
| Actinobacteria | unclassified   | 0.024       | 0.062  | 0.020                   | 0.052  | 0.048                   | 0.058  |
| Bacteroidetes  | Porphyromonas  | rare        | rare   | 0.017                   | rare   | rare                    | rare   |
| Bacteroidetes  | Prevotella     | 0.025       | rare   | rare                    | rare   | rare                    | rare   |
| Bacteroidetes  | unclassified   | 0.111       | 0.017  | rare                    | 0.091  | 0.066                   | 0.019  |

|                 |                                                                        |       |       |       |       |       |       |
|-----------------|------------------------------------------------------------------------|-------|-------|-------|-------|-------|-------|
| Firmicutes      | Clostridium<br>sensu_stricto<br>Clostridium                            | 0.014 | rare  | rare  | rare  | rare  | rare  |
| Firmicutes      | XVIII                                                                  | 0.016 | rare  | rare  | rare  | rare  | rare  |
| Firmicutes      | Erysipelothrix                                                         | 0.013 | rare  | rare  | rare  | rare  | rare  |
| Firmicutes      | Paenibacillus                                                          | 0.013 | rare  | rare  | rare  | rare  | rare  |
| Firmicutes      | Staphylococcus                                                         |       | rare  | rare  | rare  | 0.033 | 0.015 |
| Firmicutes      | Streptococcus                                                          | 0.040 | 0.029 | rare  | rare  | 0.058 | rare  |
| Firmicutes      | unclassified                                                           | 0.060 | 0.045 | 0.034 | rare  | rare  | 0.038 |
| Planctomycetes  | unclassified                                                           | rare  | rare  | 0.057 | 0.017 | rare  | rare  |
| Proteobacteria  | Acinetobacter                                                          | 0.216 | 0.159 | rare  | rare  | rare  | rare  |
| Proteobacteria  | Aeromonas                                                              | rare  | 0.022 | rare  | rare  | rare  | rare  |
| Proteobacteria  | Desulfonatronum                                                        | rare  | rare  | 0.062 | rare  | rare  | rare  |
| Proteobacteria  | Hydrogenophaga                                                         | rare  | rare  | rare  | rare  | rare  | 0.036 |
| Proteobacteria  | Massilia                                                               | 0.019 | rare  | 0.073 | rare  | rare  | rare  |
| Proteobacteria  | Pseudomonas                                                            | 0.022 | 0.018 | rare  | rare  | rare  | rare  |
| Proteobacteria  | Paracoccus                                                             | 0.017 | 0.012 | rare  | rare  | rare  | rare  |
| Proteobacteria  | Ralstonia                                                              | 0.011 | 0.025 | rare  | rare  | rare  | 0.022 |
| Proteobacteria  | Sphingomonas                                                           | rare  | 0.020 | rare  | rare  | rare  | rare  |
| Proteobacteria  | Stenotrophomonas                                                       | 0.014 | 0.028 | rare  | rare  | 0.044 | rare  |
| Proteobacteria  | unclassified                                                           | 0.108 | 0.075 | 0.173 | 0.271 | 0.143 | 0.172 |
| Verrucomicrobia | 3genus<br>incertae_sedis<br>Spartobacteria<br>genera_incertae<br>sedis | rare  | rare  | rare  | 0.042 | rare  | rare  |
| Verrucomicrobia | unclassified                                                           | rare  | 0.013 | rare  | 0.085 | rare  | rare  |
| Verrucomicrobia | unclassified                                                           | rare  | rare  | rare  | rare  | rare  | 0.046 |
| Unclassified    | unclassified                                                           | rare  | 0.071 | 0.054 | 0.176 | 0.211 | 0.184 |
| Other           |                                                                        | 0.202 | 0.157 | 0.094 | 0.191 | 0.212 | 0.111 |
